# Supplementary material for: A physics-informed measurement protocol for expectation values of fermionic observables
Source: Royal Society of Chemistry journal article supplement (doi:10.1039/d5dd00251f), 2025-11-21
Supplement: d5dd00251f1.pdf [file d5dd00251f1.pdf]

## Supporting Information

Davide Bincoletto<sup>1</sup> and Jakob S. Kottmann<sup>1,2,\*</sup>

<sup>1</sup>*Institute for Computer Science, University of Augsburg, Germany*

<sup>2</sup>*Center for Advanced Analytics and Predictive Sciences, University of Augsburg, Germany*

(Dated: September 12, 2025)

### 1. Full tables

Tables I and II show all the numerical results displayed in the Figures of the main manuscript.

Table I. Full results number of measurement groups needed for different reduction methods. In Scenario I and II we considered the number of steps that achieved the lowest error. Free H<sub>6</sub> refers to randomized molecule geometries and the values correspond to mean and standard deviation of the sample.

| Method             | Linear H <sub>4</sub> | Square H <sub>4</sub> | Linear H <sub>6</sub> | Circular H <sub>6</sub> | Free H <sub>6</sub> | Linear H <sub>8</sub> |
|--------------------|-----------------------|-----------------------|-----------------------|-------------------------|---------------------|-----------------------|
| Original <i>H</i>  | 361                   | 357                   | 1623                  | 1795                    | 1382±265            | 3985                  |
| Pauli-grouping     |                       |                       |                       |                         |                     |                       |
| LF                 | 28                    | 21                    | 90                    | 91                      | 74±15               | 154                   |
| RLF                | 19                    | 22                    | 60                    | 64                      | 54±8                | 111                   |
| SI                 | 19                    | 19                    | 68                    | 77                      | 64±9                | 114                   |
| Fermionic-grouping |                       |                       |                       |                         |                     |                       |
| LR                 | 10                    | 11                    | 22                    | 22                      | 20±2                | 33                    |
| FFF-LR             | 10                    | 11                    | 22                    | 22                      | 20±2                | 33                    |
| This work          |                       |                       |                       |                         |                     |                       |
| Scenario I         | 9                     | 9                     | 9                     | 15                      | 45±38               | 6                     |
| Scenario II        | 9                     | 9                     | 9                     | 15                      | 12±20               | 6                     |

Table II. Full results number of measurement needed for different reduction methods. Every number is multiplied by  $\times 10^4$ . Free H<sub>6</sub> refers to randomized molecule geometries and the values correspond to mean and standard deviation of the sample.

| Method             | Linear H <sub>4</sub> | Square H <sub>4</sub> | Linear H <sub>6</sub> | Circular H <sub>6</sub> | Free H <sub>6</sub> | Linear H <sub>8</sub> |
|--------------------|-----------------------|-----------------------|-----------------------|-------------------------|---------------------|-----------------------|
| Pauli-grouping     |                       |                       |                       |                         |                     |                       |
| LF                 | 11.89                 | 6.41                  | 19.10                 | 35.10                   | 16.06±6.36          | 26.88                 |
| RLF                | 4.99                  | 9.94                  | 22.24                 | 27.08                   | 16.60±6.65          | 25.89                 |
| SI                 | 3.48                  | 2.77                  | 3.58                  | 4.27                    | 4.60±2.15           | 3.60                  |
| Fermionic-grouping |                       |                       |                       |                         |                     |                       |
| LR                 | 119.96                | 167.26                | 164.59                | 268.19                  | 253.73±64.54        | 237.93                |
| FFF-LR             | 3.89                  | 155.24                | 3.74                  | 258.04                  | 16.13±7.57          | 3.17                  |
| This work          |                       |                       |                       |                         |                     |                       |
| Scenario I         | 2.28                  | 2.44                  | 2.55                  | 3.17                    | 5.69±4.57           | 2.60                  |
| Scenario II        | 2.19                  | 2.44                  | 2.35                  | 3.17                    | 4.94±4.78           | 2.48                  |

\* E-mail: [jakob.kottmann@uni-a.de](mailto:jakob.kottmann@uni-a.de)

## GLOSSARY

**LF**: Large First [1]  
**RLF**: Recursive Largest First [1]  
**SI**: Sorted Insertion [2, 3]  
**LR**: Low-rank decomposition [4, 5]  
**FFF-LR**: Fluid Fermionic Fragments [6]

## 2. Visualization of HCB elements

The operators  $\alpha_k$ ,  $\beta_{kl}$ ,  $\gamma_{kl}$  and  $\delta_{kl}$  presented in the main manuscript account for multiple creation and destruction fermionic operators with all possible spin combinations. In Figure 1 we display a visual representation of all the terms that one needs to take into consideration and why we can interpret them as paired-electrons or quasi-bosonic particle creation and destruction operators. In each of the four operators we end up with two terms which provide the same contribution. The  $\frac{1}{2}$  coefficient in the Hamiltonian definition takes care of this repetition.

- 
- [1] V. Verteletskyi, T.-C. Yen, and A. F. Izmaylov, Measurement optimization in the variational quantum eigensolver using a minimum clique cover, [Journal of Chemical Physics](#) **152**, 124114 (2020).
  - [2] O. Crawford, B. van Straaten, D. Wang, T. Parks, E. Campbell, and S. Brierley, Efficient quantum measurement of Pauli operators in the presence of finite sampling error, [arxiv:1908.06942](#) (2019), [arxiv:1908.06942](#).
  - [3] Z. P. Bansingh, T.-C. Yen, P. D. Johnson, and A. F. Izmaylov, Fidelity Overhead for Nonlocal Measurements in Variational Quantum Algorithms, [PRX Quantum](#) **2**, 040320.
  - [4] W. J. Huggins, J. R. McClean, N. C. Rubin, Z. Jiang, N. Wiebe, K. B. Whaley, and R. Babbush, Efficient and noise resilient measurements for quantum chemistry on near-term quantum computers, [npj Quantum Information](#) **7**, 1.
  - [5] T.-C. Yen and A. F. Izmaylov, Cartan Subalgebra Approach to Efficient Measurements of Quantum Observables, [PRX Quantum](#) **2**, 040320.
  - [6] S. Choi, I. Loaiza, and A. F. Izmaylov, Fluid fermionic fragments for optimizing quantum measurements of electronic Hamiltonians in the variational quantum eigensolver, [Quantum](#) **7**, 889, [2208.14490](#).

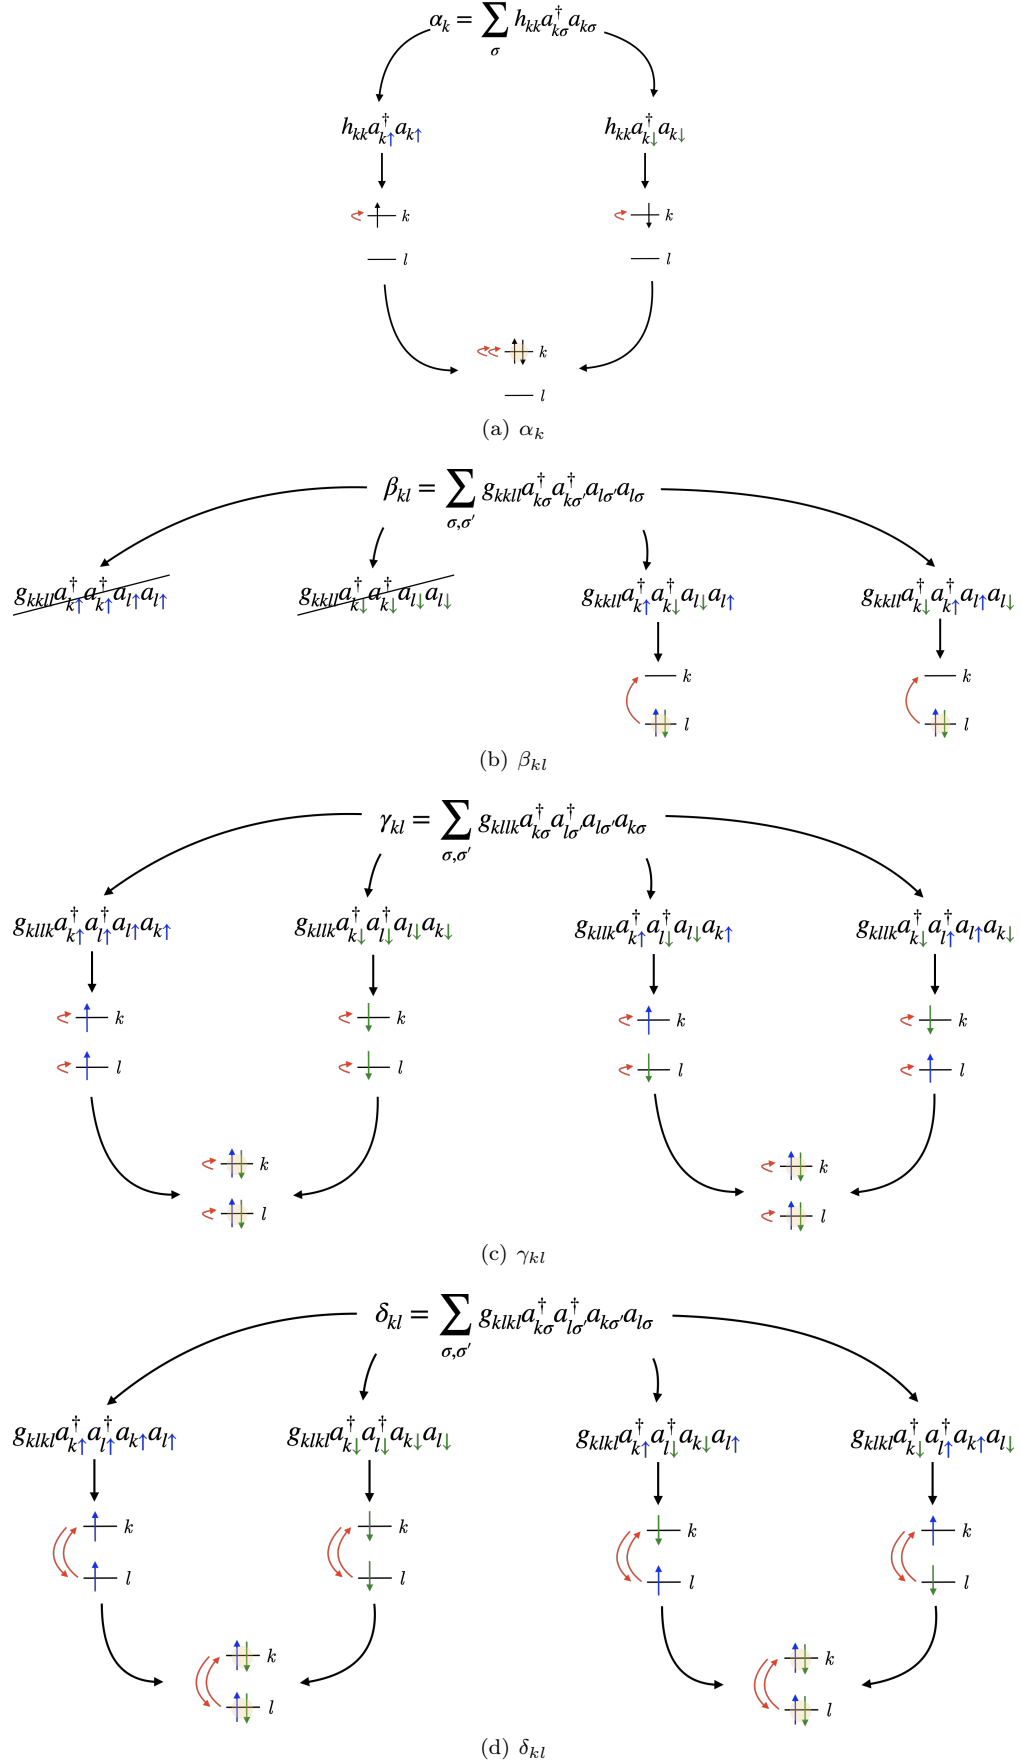

Figure 1. Visualization of HCB elements. Each operator is expanded in all the possible spin combinations. These are then visually represented to explicit the paired-electrons, or quasi-bosonic particles, interpretation. The first and second terms stemming from  $\beta_{kl}$  with all coherent spins are not allowed due to fermionic operators commutativity properties.
